# Supplementary material for: Extent of Mucosal Inflammation in Ulcerative Colitis Influences the Clinical Remission Induced by Vedolizumab
Source: PubMed Central journal article supplement (PMC7073927; doi:10.3390/jcm9020385), 2020-02-01
Supplement: jcm-09-00385-s001.pdf [file jcm-09-00385-s001.pdf]

**Table S1.** Distribution of the clinical activity of disease at baseline in Crohn's disease patients with ileal disease (L1), colonic disease (L2) and ileocolonic disease (L3).

| Variable                   | L1 (n = 20) | L2 (n = 7) | L3 (n = 47) |
|----------------------------|-------------|------------|-------------|
| Mild Clinical Activity     | 8 (40%)     | 3 (43%)    | 15 (32%)    |
| Moderate Clinical Activity | 12 (60%)    | 3 (43%)    | 30 (64%)    |
| Severe Clinical Activity   | 0           | 1 (14%)    | 2 (4%)      |

$p$  value = 0.739.

**Table S2.** Distribution of the clinical activity of disease at baseline in Crohn's disease patients with inflammatory behaviour (B1), stricturing behaviour (B2) and penetrating behaviour (B3).

| Variable                   | B1 (n = 24) | B2 (n = 23) | B3 (n = 27) |
|----------------------------|-------------|-------------|-------------|
| Mild Clinical Activity     | 12 (50%)    | 1 (4%)      | 13 (48%)    |
| Moderate Clinical Activity | 10 (42%)    | 22 (96%)    | 13 (48%)    |
| Severe Clinical Activity   | 2 (8%)      | 0           | 1 (4%)      |

Association between moderate clinical activity and stricturing behaviour,  $p = 0.001$ .

**Table S3.** Distribution of the clinical activity of disease at baseline in patients with distal/left-sided colitis or extensive ulcerative colitis.

| Variable                   | UC patients with distal/left-sided colitis (n = 40) | UC patients with extensive colitis (n = 67) | $\chi^2$    |
|----------------------------|-----------------------------------------------------|---------------------------------------------|-------------|
| Mild Clinical Activity     | 13 (32%)                                            | 18 (27%)                                    | $p = 0.534$ |
| Moderate Clinical Activity | 24 (60%)                                            | 40 (60%)                                    | $p = 0.975$ |
| Severe Clinical Activity   | 3 (8%)                                              | 9 (13%)                                     | $p = 0.346$ |

**Table S4.** Distribution of baseline characteristics in Crohn's disease patients with clinical remission (remitters) as compared to patients without clinical response (non-responders) at week 14.

| Variable                                                                 | CD remitters ( <i>n</i> = 17) | CD non-responders ( <i>n</i> = 40) | X <sup>2</sup> Fisher test |
|--------------------------------------------------------------------------|-------------------------------|------------------------------------|----------------------------|
| male gender, <i>n</i> (%)                                                | 11 (65%)                      | 15 (37%)                           | <i>p</i> = 0.059           |
| young age at diagnosis (<40 years), <i>n</i> (%)                         | 13 (76%)                      | 33 (82%)                           | <i>p</i> = 0.597           |
| long standing disease (≥8 years), <i>n</i> (%)                           | 16 (94%)                      | 29 (72%)                           | <i>p</i> = 0.067           |
| perianal disease, <i>n</i> (%)                                           | 6 (35%)                       | 12 (30%)                           | <i>p</i> = 0.694           |
| prior ileo-colonic resection, <i>n</i> (%)                               | 12 (71%)                      | 25 (62%)                           | <i>p</i> = 0.558           |
| smoking status, <i>n</i> (%)                                             |                               |                                    |                            |
| Never                                                                    | 10 (59%)                      | 15 (37%)                           | <i>p</i> = 0.137           |
| Former                                                                   | 3 (18%)                       | 13 (32%)                           | <i>p</i> = 0.253           |
| Current                                                                  | 4 (23%)                       | 12 (31%)                           | <i>p</i> = 0.618           |
| prior immunosuppressive therapy, <i>n</i> (%)                            | 11 (65%)                      | 32 (80%)                           | <i>p</i> = 0.219           |
| prior TNF antagonist, <i>n</i> (%)                                       | 13 (76%)                      | 35 (87%)                           | <i>p</i> = 0.296           |
| concomitant steroids during the induction, <i>n</i> (%)                  | 8 (46%)                       | 21 (52%)                           | <i>p</i> = 0.706           |
| concomitant immunosuppressive therapy during the induction, <i>n</i> (%) | 1 (6%)                        | 4 (10%)                            | <i>p</i> = 0.615           |
| mild clinical activity (HBI 5–7), <i>n</i> (%)                           | 11 (65%)                      | 7 (18%)                            | <b><i>p</i> = 0.0004</b>   |
| moderate clinical activity (HBI 8–16), <i>n</i> (%)                      | 6 (35%)                       | 31 (77%)                           | <b><i>p</i> = 0.002</b>    |
| severe disease activity (HBI >16), <i>n</i> (%)                          | 0                             | 2 (5%)                             | <i>p</i> = 1               |
| CRP >5 mg/L, <i>n</i> (%)                                                | 9 (53%)                       | 23 (57%)                           | <i>p</i> = 0.751           |

**Table S5.** Distribution of baseline characteristics in Ulcerative colitis patients with clinical remission (remitters) as compared to patients without clinical response (non-responders) at week 14.

| Variable                                                                 | UC remitters<br>( <i>n</i> = 34) | UC non-responders<br>( <i>n</i> = 47) | X <sup>2</sup>            |
|--------------------------------------------------------------------------|----------------------------------|---------------------------------------|---------------------------|
| male gender, <i>n</i> (%)                                                | 21 (62%)                         | 24 (51%)                              | <i>p</i> = 0.338          |
| young age at diagnosis (<40 years), <i>n</i> (%)                         | 25 (73%)                         | 34 (72%)                              | <i>p</i> = 0.905          |
| long standing disease (≥8 years), <i>n</i> (%)                           | 25 (73%)                         | 35 (74%)                              | <i>p</i> = 0.924          |
| smoking status, <i>n</i> (%)                                             |                                  |                                       |                           |
| never                                                                    | 25 (73%)                         | 33 (70%)                              | <i>p</i> = 0.743          |
| former                                                                   | 5 (15%)                          | 9 (19%)                               | <i>p</i> = 0.601          |
| current                                                                  | 4 (12%)                          | 5 (11%)                               | <i>p</i> = 0.873          |
| prior immunosuppressive therapy, <i>n</i> (%)                            | 25 (73%)                         | 33 (70%)                              | <i>p</i> = 0.743          |
| prior TNF antagonist, <i>n</i> (%)                                       | 27 (79%)                         | 37 (79%)                              | <i>p</i> = 0.940          |
| concomitant steroids during the induction, <i>n</i> (%)                  | 22 (65%)                         | 31 (66%)                              | <i>p</i> = 0.906          |
| concomitant immunosuppressive therapy during the induction, <i>n</i> (%) | 3 (9%)                           | 2 (4%)                                | <i>p</i> = 0.399          |
| mild clinical activity (pMayo 2–4), <i>n</i> (%)                         | 13 (38%)                         | 14 (30%)                              | <i>p</i> = 0.426          |
| moderate clinical activity (pMayo 5–7), <i>n</i> (%)                     | 21 (62%)                         | 24 (51%)                              | <i>p</i> = 0.338          |
| severe disease activity (pMayo 8–9), <i>n</i> (%)                        | 0                                | 9 (19%)                               | <b><i>p</i> = 0.008</b>   |
| CRP >5 mg/L, <i>n</i> (%)                                                | 20 (59%)                         | 28 (59%)                              | <i>p</i> = 0.945          |
| Distal/Left-sided colitis                                                | 21 (62%)                         | 9 (19%)                               | <b><i>p</i> = 0.00008</b> |
| Extensive Colitis                                                        | 13 (38%)                         | 38 (81%)                              | <b><i>p</i> = 0.00008</b> |

**Table S6.** Distribution of baseline characteristics in Crohn's disease patients with and without clinical response at week 14.

| Variable                                                          | CD responders<br>(n = 17) | CD non-responders<br>(n = 40) | X <sup>2</sup> |
|-------------------------------------------------------------------|---------------------------|-------------------------------|----------------|
| male gender, n (%)                                                | 8 (47%)                   | 15 (37%)                      | p = 0.500      |
| young age at diagnosis (<40 years), n (%)                         | 16 (94%)                  | 33 (82%)                      | p = 0.247      |
| long standing disease (≥8 years), n (%)                           | 14 (82%)                  | 29 (72%)                      | p = 0.429      |
| perianal disease, n (%)                                           | 5 (29%)                   | 12 (30%)                      | p = 0.964      |
| prior ileo-colonic resection, n (%)                               | 7 (41%)                   | 25 (62%)                      | p = 0.137      |
| smoking status, n (%)                                             |                           |                               |                |
| Never                                                             | 9 (53%)                   | 15 (37%)                      | p = 0.280      |
| Former                                                            | 3 (18%)                   | 13 (32%)                      | p = 0.253      |
| Current                                                           | 5 (29%)                   | 12 (31%)                      | p = 0.964      |
| prior immunosuppressive therapy, n (%)                            | 14 (82%)                  | 32 (80%)                      | p = 0.836      |
| prior TNF antagonist, n (%)                                       | 15 (88%)                  | 35 (87%)                      | p = 0.938      |
| concomitant steroids during the induction, n (%)                  | 9 (53%)                   | 21 (52%)                      | p = 0.975      |
| concomitant immunosuppressive therapy during the induction, n (%) | 5 (29%)                   | 4 (10%)                       | p = 0.065      |
| mild clinical activity (HBI 5–7), n (%)                           | 6 (35%)                   | 7 (18%)                       | p = 0.142      |
| moderate clinical activity (HBI 8–16), n (%)                      | 10 (59%)                  | 31 (77%)                      | p = 0.151      |
| severe disease activity (HBI > 16), n (%)                         | 1 (6%)                    | 2 (5%)                        | p = 0.891      |
| CRP > 5mg/L, n (%)                                                | 12 (71%)                  | 23 (57%)                      | p = 0.353      |

**Table S7.** Distribution of baseline characteristics in Ulcerative colitis patients with and without clinical response at week 14.

| <b>Variable</b>                                                             | <b>UC responders<br/>(n = 26)</b> | <b>UC non-responders<br/>(n = 47)</b> | <b>X<sup>2</sup></b> |
|-----------------------------------------------------------------------------|-----------------------------------|---------------------------------------|----------------------|
| male gender, <i>n</i> (%)                                                   | 11 (42%)                          | 24 (51%)                              | <i>p</i> = 0.473     |
| young age at diagnosis (<40 years), <i>n</i> (%)                            | 16 (62%)                          | 34 (72%)                              | <i>p</i> = 0.341     |
| long standing disease (≥8 years), <i>n</i> (%)                              | 20 (77%)                          | 35 (74%)                              | <i>p</i> = 0.815     |
| smoking status, <i>n</i> (%)                                                |                                   |                                       |                      |
| never                                                                       | 16 (62%)                          | 33 (70%)                              | <i>p</i> = 0.449     |
| former                                                                      | 5 (19%)                           | 9 (19%)                               | <i>p</i> = 0.993     |
| current                                                                     | 5 (19%)                           | 5 (11%)                               | <i>p</i> = 0.306     |
| prior immunosuppressive therapy, <i>n</i> (%)                               | 18 (69%)                          | 33 (70%)                              | <i>p</i> = 0.930     |
| prior TNF antagonist, <i>n</i> (%)                                          | 22 (85%)                          | 37 (79%)                              | <i>p</i> = 0.540     |
| concomitant steroids during the induction, <i>n</i> (%)                     | 16 (62%)                          | 31 (66%)                              | <i>p</i> = 0.705     |
| concomitant immunosuppressive therapy during<br>the induction, <i>n</i> (%) | 4 (15%)                           | 2 (4%)                                | <i>p</i> = 0.097     |
| mild clinical activity (pMayo 2–4), <i>n</i> (%)                            | 4 (15%)                           | 14 (30%)                              | <i>p</i> = 0.171     |
| moderate clinical activity (pMayo 5–7), <i>n</i> (%)                        | 19 (73%)                          | 24 (51%)                              | <i>p</i> = 0.067     |
| severe disease activity (pMayo 8–9), <i>n</i> (%)                           | 3 (12%)                           | 9 (19%)                               | <i>p</i> = 0.400     |
| CRP >5 mg/L, <i>n</i> (%)                                                   | 13 (50%)                          | 28 (59%)                              | <i>p</i> = 0.429     |
| Distal/Left-sided colitis                                                   | 10 (38%)                          | 9 (19%)                               | <i>p</i> = 0.071     |
| Extensive Colitis                                                           | 16 (62%)                          | 38 (81%)                              | <i>p</i> = 0.071     |
